# Supplementary material for: One-Year Self-Reported Appetite Is Similar in Adolescents with Obesity Who Do or Do Not Undergo Sleeve Gastrectomy
Source: MDPI journal article supplement (doi:10.3390/nu14153054), 2022-07-26
Supplement: s1 [file s1]

## Additional File 1: Visual Analogue Scale for Appetite Measure

|                                                                                                       |                                                                                                                                                                         |
|-------------------------------------------------------------------------------------------------------|-------------------------------------------------------------------------------------------------------------------------------------------------------------------------|
| <b>1. How hungry do you feel?</b><br><small>* must provide value</small>                              | <div>I am not hungry at all</div> <div>I have never been more hungry</div> <div><div></div></div> <div>Change the slider above to set a response</div> <div>reset</div> |
| <b>2. How strong is your desire to eat your favorite food?</b><br><small>* must provide value</small> | <div>Not strong at all</div> <div>Extremely strong</div> <div><div></div></div> <div>Change the slider above to set a response</div> <div>reset</div>                   |
| <b>3. How satisfied do you feel?</b><br><small>* must provide value</small>                           | <div>I am completely empty</div> <div>I cannot eat another bite</div> <div><div></div></div> <div>Change the slider above to set a response</div> <div>reset</div>      |
| <b>4. How full do you feel?</b><br><small>* must provide value</small>                                | <div>Not at all full</div> <div>Totally full</div> <div><div></div></div> <div>Change the slider above to set a response</div> <div>reset</div>                         |
| <b>5. How much do you think you can eat?</b><br><small>* must provide value</small>                   | <div>Nothing at all</div> <div>A lot</div> <div><div></div></div> <div>Change the slider above to set a response</div> <div>reset</div>                                 |
| <b>6. Would you like to eat something sweet?</b><br><small>* must provide value</small>               | <div>Yes, very much</div> <div>No, not at all</div> <div><div></div></div> <div>Change the slider above to set a response</div> <div>reset</div>                        |
| <b>7. Would you like to eat something salty?</b><br><small>* must provide value</small>               | <div>Yes, very much</div> <div>No, not at all</div> <div><div></div></div> <div>Change the slider above to set a response</div> <div>reset</div>                        |
| <b>8. Would you like to eat something savory?</b><br><small>* must provide value</small>              | <div>Yes, very much</div> <div>No, not at all</div> <div><div></div></div> <div>Change the slider above to set a response</div> <div>reset</div>                        |
| <b>9. Would you like to eat something fatty?</b><br><small>* must provide value</small>               | <div>Yes, very much</div> <div>No, not at all</div> <div><div></div></div> <div>Change the slider above to set a response</div> <div>reset</div>                        |
